# Supplementary material for: The Performance of ChatGPT-4o and DeepSeek-R1 in Interpreting Thyroid Nodule Ultrasound Text Report: A Multicenter Study
Source: Research Square preprint supplement (doi:10.21203/rs.3.rs-7574125/v1), 2025-10-23
Supplement: Supplementary file 1 [file 1c9d78792165eec7cbb2bda2.docx]

**Supplemental Materia**

**Standardized prompt**

Prompt 1(Differentiation between benign and malignant): As an ultrasound expert with expertise in diagnosing thyroid nodules, please determine the nodule's benign or malignant nature and provide your diagnostic rationale based on the provided ultrasound examination description, such as location, orientation, margin, halo, composition, echogenicity, echotexture, echogenic foci, posterior feature, and size. Finally, please provide a clear diagnostic conclusion.

Prompt 2(C-TIRADS classification): As a senior ultrasound expert with extensive professional knowledge in diagnosing thyroid nodules, please determine the malignant risk level of the nodule (1, 2, 3, 4a, 4b, 4c, 5) according to the following ultrasound examination description in accordance with the C-TIRADS guidelines. The result should be definite without ambiguous answers.

Prompt 3(Management recommendation): As a senior clinical expert in thyroid diseases with extensive expertise in diagnosing thyroid nodules, please offer the optimal management recommendation (follow-up/FNA) based on the provided ultrasound examination description and the radiologist's classification of the nodules according to the C-TIRADS guidelines.
